# Supplementary material
Source: publisher figshare collection journal article supplement (https://acs.figshare.com/ndownloader/files/4142170)
Supplement: Supplementary file 1 [file 4142170]

Supporting Materials for:

**Two Different Roles of Metallic Ag on Ag/AgX/BiOX (X = Cl, Br) Visible Light Photocatalysts: Surface Plasmon Resonance and Z-scheme Bridge**

Liqun Ye, Jinyan Liu, Chuqing Gong, Lihong Tian, Tianyou Peng  
and Ling Zan\*

*College of Chemistry and Molecular Science, Wuhan University, Wuhan  
430072, People's Republic of China*

*E-mail:irlab@whu.edu.cn (L. Zan)*

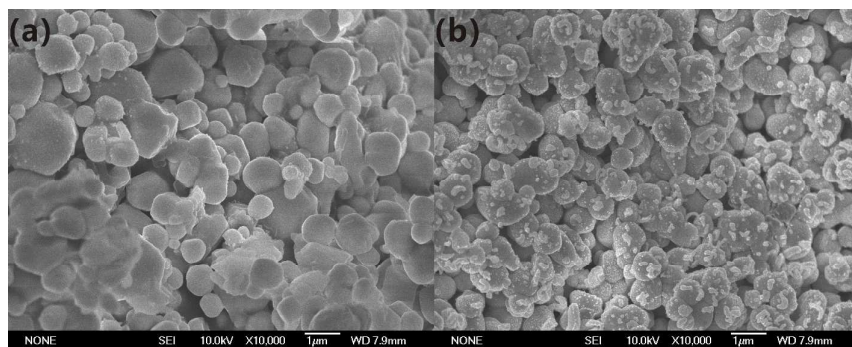

**Figure S1.** FESEM images of Ag/AgCl (a) and Ag/AgBr (b).

The FESEM images of Ag/AgX were shown in Figure S1. It can be seen that AgX consisted of a large amount sphere (ca. 1  $\mu\text{m}$ ) and the smooth surfaces were covered with Ag nanograins of 40 nm in size.
